# Supplementary material for: Synthesis and biological activities of novel furo[2,3,4-jk][2]benzazepin-4(3H)-one derivatives
Source: Royal Society of Chemistry journal article supplement (doi:10.1039/b614510h), 2007-01-01
Supplement: b614510h.pdf [file b614510h.pdf]

**Table S1** Physical data and yields of **7**, **10**, **11**, **12**

| Compd      | Yield (%)              | m.p. (°C)   | <sup>1</sup> H-NMR                                                                                                                                                                                                                                                                                                                    | MS <i>m/z</i> (int.)                        | formula                                                                                                  |
|------------|------------------------|-------------|---------------------------------------------------------------------------------------------------------------------------------------------------------------------------------------------------------------------------------------------------------------------------------------------------------------------------------------|---------------------------------------------|----------------------------------------------------------------------------------------------------------|
|            |                        |             |                                                                                                                                                                                                                                                                                                                                       |                                             | HR-MS <i>m/z</i> M <sup>+</sup><br>Calcd (Found)<br>or Analysis<br>Calcd(Found)                          |
| <b>7</b>   | 75.0                   | 126.2-128.7 | $\delta_{\text{H}}$ (60 MHz; CDCl <sub>3</sub> ; Me <sub>4</sub> Si) 2.37 (3H, s, OCOCH <sub>3</sub> ), 3.84 (3H, s, OCH <sub>3</sub> ), 7.80 (1H, d, <i>J</i> 7.8, 4- or 5-H), 7.51 (1H, d, <i>J</i> 8.8, 4- or 5-H), 10.27 (1H, s, CHO)                                                                                             | 272(10.75),<br>230(M <sup>+</sup> , 100.00) | –                                                                                                        |
| <b>10</b>  | 72.9<br>from <b>7</b>  | 116.2-119.4 | $\delta_{\text{H}}$ (60 MHz; acetone- <i>d</i> <sub>6</sub> ; Me <sub>4</sub> Si) 3.92 (3H, s, OCH <sub>3</sub> ), 6.90-7.25 (2H, m, 4-, 5-H)                                                                                                                                                                                         | 229(99.28),<br>227(M <sup>+</sup> , 100.00) | –                                                                                                        |
| <b>11</b>  | –                      | 82.4-85.6   | $\delta_{\text{H}}$ (60 MHz; CDCl <sub>3</sub> ; Me <sub>4</sub> Si) 1.30 (3H, t, <i>J</i> 7.1, CH <sub>2</sub> CH <sub>3</sub> ), 3.90 (3H, s, OCH <sub>3</sub> ), 4.26 (2H, q, <i>J</i> 7.1, CH <sub>2</sub> CH <sub>3</sub> ), 4.80 (2H, s, OCH <sub>2</sub> ), 6.96 (1H, d, <i>J</i> 8.8, 6-H), 7.32 (1H, d, <i>J</i> 8.8, 5-H)   | 313(M <sup>+</sup> , 100.00)                | –                                                                                                        |
| <b>12a</b> | 79.0                   | 149.9-150.6 | $\delta_{\text{H}}$ (60 MHz; CDCl <sub>3</sub> ; Me <sub>4</sub> Si) 2.51 (3H, s, COCH <sub>3</sub> ), 3.99 (3H, s, OCH <sub>3</sub> ), 6.16 (2H, br s, NH <sub>2</sub> ), 6.79 (1H, d, <i>J</i> 8.5, 6-H), 7.23 (1H, d, <i>J</i> 8.6, 5-H)                                                                                           | 283(M <sup>+</sup> , 100.00),               | C <sub>11</sub> H <sub>10</sub> BrNO <sub>3</sub><br>C;46.50 (46.46)<br>H;3.55 (3.58)<br>N;4.93 (4.86)   |
| <b>12b</b> | 81.6                   | 203.1-205.9 | $\delta_{\text{H}}$ (60 MHz; CDCl <sub>3</sub> ; Me <sub>4</sub> Si) 3.98 (3H, s, OCH <sub>3</sub> ), 6.64 (2H, br s, NH <sub>2</sub> ), 6.81 (1H, d, <i>J</i> 8.5, 6-H), 7.26 (1H, d, <i>J</i> 8.8, 5-H), 7.41-7.56 (2H, m, 2'-, 6'-H or 3'-, 5'-H), 8.13-8.28 (2H, m, 2'-, 6'-H or 3'-, 5'-H)                                       | 379(M <sup>+</sup> , 73.07),<br>380(100.00) | C <sub>16</sub> H <sub>11</sub> BrClNO <sub>3</sub><br>C;50.49 (50.56)<br>H;2.91 (2.84)<br>N;3.68 (3.66) |
| <b>12c</b> | 77.2<br>from <b>10</b> | 210.6-211.6 | $\delta_{\text{H}}$ (60 MHz; CDCl <sub>3</sub> ; Me <sub>4</sub> Si) 1.41 (3H, t, <i>J</i> 7.1, CH <sub>2</sub> CH <sub>3</sub> ), 3.96 (3H, s, OCH <sub>3</sub> ), 4.43 (2H, q, <i>J</i> 6.8, CH <sub>2</sub> CH <sub>3</sub> ), 5.53 (2H, br s, NH <sub>2</sub> ), 6.75 (1H, d, <i>J</i> 8.3, 6-H), 7.22 (1H, d, <i>J</i> 8.3, 5-H) | 313(M <sup>+</sup> , 100.00)                | C <sub>12</sub> H <sub>12</sub> BrNO <sub>4</sub><br>C;45.88 (45.80)<br>H;3.85 (3.84)<br>N;4.46 (4.42)   |

**Table S2** Physical data and yields of **13**, **14**, **18**, **19**

| Compd      | Yield (%) | m.p. (°C)   | <sup>1</sup> H-NMR                                                                                                                                                                                                                                                                                                                                                                                                                                                                                              | MS <i>m/z</i> (int.)                                       | formula                                                                                                                |
|------------|-----------|-------------|-----------------------------------------------------------------------------------------------------------------------------------------------------------------------------------------------------------------------------------------------------------------------------------------------------------------------------------------------------------------------------------------------------------------------------------------------------------------------------------------------------------------|------------------------------------------------------------|------------------------------------------------------------------------------------------------------------------------|
|            |           |             |                                                                                                                                                                                                                                                                                                                                                                                                                                                                                                                 |                                                            | HR-MS <i>m/z</i> M <sup>+</sup><br>Calcd (Found)<br>or Analysis<br>Calcd(Found)                                        |
| <b>13</b>  | 93.0      | 225.2-227.9 | $\delta_{\text{H}}$ (60 MHz; DOSO- <i>d</i> <sub>6</sub> ; Me <sub>4</sub> Si) 1.32 (3H, t, <i>J</i> 7.1, CH <sub>2</sub> CH <sub>3</sub> ), 3.70-4.50 (7H, m, CH <sub>2</sub> CH <sub>3</sub> , CH <sub>2</sub> Cl, OCH <sub>3</sub> ), 7.11 (1H, d, <i>J</i> 8.3, 6-H), 7.51 (1H, d, <i>J</i> 8.1, 5-H), 10.19 (1H, br s, NH)                                                                                                                                                                                 | 389(M <sup>+</sup> , 25.60),<br>264(100.00)                | –                                                                                                                      |
| <b>14</b>  | 86.1      | 109.8-112.3 | $\delta_{\text{H}}$ (60 MHz; CDCl <sub>3</sub> ; Me <sub>4</sub> Si) 1.38 (9H, t, <i>J</i> 7.2, CH <sub>2</sub> CH <sub>3</sub> ×3), 3.15 (2H, d, <i>J</i> 20.5, PCH <sub>2</sub> ), 3.99 (3H, s, OCH <sub>3</sub> ), 4.12-4.61 (6H, m, CH <sub>2</sub> CH <sub>3</sub> ×3), 6.78 (1H, d, <i>J</i> 8.3, 6-H), 7.34 (1H, d, <i>J</i> 8.3, 5-H), 8.91 (1H, br s, NH)                                                                                                                                              | 491(M <sup>+</sup> , 19.83),<br>412(59.45),<br>313(100.00) | C <sub>18</sub> H <sub>23</sub> BrNO <sub>3</sub> P<br>C;43.92 (43.96)<br>H;4.71 (4.77)<br>N;2.85 (3.05)               |
| <b>18a</b> | 81.8      | 224.9-226.3 | $\delta_{\text{H}}$ (60 MHz; CDCl <sub>3</sub> ; Me <sub>4</sub> Si) 2.53 (3H, s, COCH <sub>3</sub> ), 2.94-3.04 (2H, m, CH <sub>2</sub> CH <sub>2</sub> ), 3.81-3.98 (2H, m, CH <sub>2</sub> CH <sub>2</sub> ), 3.98 (3H, s, OCH <sub>3</sub> ), 7.10 (1H, d, <i>J</i> 8.6, 6-H), 7.48 (1H, d, <i>J</i> 8.0, 5-H), 10.0 (1H, br s, NH)                                                                                                                                                                         | 373(12.14),<br>283(M <sup>+</sup> , 100.00)                | C <sub>14</sub> H <sub>13</sub> BrClNO <sub>4</sub><br>C;44.89 (44.89)<br>H;3.50 (3.47)<br>N;3.74 (3.72)               |
| <b>18b</b> | 80.1      | 222.6-224.2 | $\delta_{\text{H}}$ (400 MHz; acetone- <i>d</i> <sub>6</sub> ; Me <sub>4</sub> Si) 2.85 (2H, t, <i>J</i> 6.6, CH <sub>2</sub> CH <sub>2</sub> ), 3.75 (2H, t, <i>J</i> 6.6, CH <sub>2</sub> CH <sub>2</sub> ), 4.04 (3H, s, OCH <sub>3</sub> ), 7.10 (1H, d, <i>J</i> 8.5, 6-H), 7.47 (1H, d, <i>J</i> 8.5, 5-H), 7.58-7.61 (2H, m, 2'-, 6'-H or 3'-, 5'-H), 7.99-8.03 (2H, m, 2'-, 6'-H or 3'-, 5'-H), 9.01 (1H, br s, NH)                                                                                     | 469(M <sup>+</sup> , 11.94),<br>380(100.00)                | C <sub>19</sub> H <sub>14</sub> BrCl <sub>2</sub> NO <sub>4</sub><br>C;48.44 (48.38)<br>H;3.00 (3.19)<br>N;2.97 (3.11) |
| <b>18c</b> | 79.0      | 241.1-243.2 | $\delta_{\text{H}}$ (400 MHz; acetone- <i>d</i> <sub>6</sub> ; Me <sub>4</sub> Si) 1.37 (3H, t, <i>J</i> 7.3, CH <sub>2</sub> CH <sub>3</sub> ), 3.02 (2H, t, <i>J</i> 5.9, CH <sub>2</sub> CH <sub>2</sub> ), 3.92 (2H, t, <i>J</i> 6.6, CH <sub>2</sub> CH <sub>2</sub> ), 4.03 (3H, s, OCH <sub>3</sub> ), 4.38 (2H, q, <i>J</i> 7.3, CH <sub>2</sub> CH <sub>3</sub> ), 7.05 (1H, d, <i>J</i> 8.4, 6-H), 7.43 (1H, d, <i>J</i> 8.4, 5-H), 9.01 (1H, br s, NH)                                               | 403(M <sup>+</sup> , 16.46),<br>313(100.00)                | C <sub>15</sub> H <sub>15</sub> BrClBrNO <sub>5</sub><br>5<br>C;44.52 (44.52)<br>H;3.74 (3.68)<br>N;3.46 (3.53)        |
| <b>19a</b> | 22.5      | 228.6-230.9 | $\delta_{\text{H}}$ (500 MHz; CDCl <sub>3</sub> ; Me <sub>4</sub> Si) 1.39 (3H, t, <i>J</i> 7.2, CH <sub>2</sub> CH <sub>3</sub> ), 4.00 (3H, s, OCH <sub>3</sub> ), 4.42 (2H, q, <i>J</i> 7.4, CH <sub>2</sub> CH <sub>3</sub> ), 5.84 (1H, d, <i>J</i> 10.5, CH=CH <sub>c</sub> ), 6.37 (1H, dd, <i>J</i> 16.9 and 10.0, CH <sub>a</sub> =CH <sub>2</sub> ), 6.46 (1H, dd, <i>J</i> 17.5 and 1.4, CH=CH <sub>b</sub> ), 6.80 (1H, d, <i>J</i> 8.7, 6-H), 7.35 (1H, d, <i>J</i> 8.7, 5-H), 7.70 (1H, br s, NH) | 367(M <sup>+</sup> , 25.33),<br>242(100.01)                | C <sub>15</sub> H <sub>14</sub> BrNO <sub>5</sub><br>C;48.93 (48.93)<br>H;3.80 (3.86)<br>N;3.80 (3.78)                 |

**Table S3** Physical data and yields of **17**

| Compd                    | Yield (%) | m.p. (°C)   | <sup>1</sup> H-NMR                                                                                                                                                                                                                                                                                                                                                                                                                                                                                                                                                     | MS <i>m/z</i> (int.)                                                      | formula                                                                                                                |
|--------------------------|-----------|-------------|------------------------------------------------------------------------------------------------------------------------------------------------------------------------------------------------------------------------------------------------------------------------------------------------------------------------------------------------------------------------------------------------------------------------------------------------------------------------------------------------------------------------------------------------------------------------|---------------------------------------------------------------------------|------------------------------------------------------------------------------------------------------------------------|
|                          |           |             |                                                                                                                                                                                                                                                                                                                                                                                                                                                                                                                                                                        |                                                                           | HR-MS <i>m/z</i> M <sup>+</sup><br>Calcd (Found)<br>or Analysis<br>Calcd(Found)                                        |
| <b>17a</b>               | 46.4      | 240.0-242.7 | $\delta_{\text{H}}$ (400 MHz; acetone- <i>d</i> <sub>6</sub> ; Me <sub>4</sub> Si) 2.56 (3H, s, COCH <sub>3</sub> ), 4.05 (3H, s, OCH <sub>3</sub> ), 7.06 (1H, d, <i>J</i> 15.7, CH=CH), 7.08 (1H, d, <i>J</i> 8.7, 6-H), 7.40-7.47 (3H, m, phenyl H), 7.44 (1H, d, <i>J</i> 8.4, 5-H), 7.67-7.69 (2H, m, phenyl H), 7.72 (1H, d, <i>J</i> 15.7, CH=CH), 9.10 (1H, br s, NH)                                                                                                                                                                                          | 413(M <sup>+</sup> , 6.31),<br>131(100.00)                                | C <sub>20</sub> H <sub>16</sub> BrNO <sub>4</sub><br>C;57.99 (57.96)<br>H;3.89 (3.80)<br>N;3.38 (3.37)                 |
| <b>17b</b>               | 74.3      | 208.5-213.5 | $\delta_{\text{H}}$ (400 MHz; CDCl <sub>3</sub> ; Me <sub>4</sub> Si) 1.39 (3H, t, <i>J</i> 7.0, CH <sub>2</sub> CH <sub>3</sub> ), 4.01 (3H, s, OCH <sub>3</sub> ), 4.43 (2H, q, <i>J</i> 7.0, CH <sub>2</sub> CH <sub>3</sub> ), 6.67 (1H, d, <i>J</i> 15.7, CH=CH), 6.81 (1H, d, <i>J</i> 8.5, 6-H), 7.36 (1H, d, <i>J</i> 8.4, 5-H), 7.39-7.40 (3H, m, phenyl H), 7.56-7.57 (2H, m, phenyl H), 7.78(1H, br s, NH), 7.80 (1H, d, <i>J</i> 15.7, CH=CH)                                                                                                              | 443(M <sup>+</sup> , 8.37),<br>131(100.01)                                | C <sub>21</sub> H <sub>18</sub> BrNO <sub>5</sub><br>C;56.77 (56.65)<br>H;4.08 (3.93)<br>N;3.15 (3.23)                 |
| <b>17c</b> <sup>a)</sup> | 72.7      | 210.1-215.7 | $\delta_{\text{H}}$ (500 MHz; CDCl <sub>3</sub> ; Me <sub>4</sub> Si) 1.95 (3H, dd, <i>J</i> 6.8 and 1.4, CH=CH(CH <sub>3</sub> )), 2.60 (3H, s, COCH <sub>3</sub> ), 4.00 (3H, s, OCH <sub>3</sub> ), 6.11 (1H, dd, <i>J</i> 15.1 and 1.9, CH=CH(CH <sub>3</sub> )), 6.81 (1H, d, <i>J</i> 8.3, 6-H), 7.04 (1H, dq, <i>J</i> 15.5 and 6.4, CH=CH(CH <sub>3</sub> )), 7.35 (1H, d, <i>J</i> 8.3, 5-H), 7.96 (1H, br s, NH)                                                                                                                                             | 351(M <sup>+</sup> , 13.37),<br>283(100.00)                               | –                                                                                                                      |
| <b>17d</b> <sup>a)</sup> | 58.0      | 209.5-212.5 | $\delta_{\text{H}}$ (400 MHz; CDCl <sub>3</sub> ; Me <sub>4</sub> Si) 1.93 (3H, dd, <i>J</i> 6.6 and 1.8, CH=CH(CH <sub>3</sub> )), 4.00 (3H, s, OCH <sub>3</sub> ), 6.07 (1H, dd, <i>J</i> 15.4 and 1.8, CH=CH(CH <sub>3</sub> )), 6.83 (1H, d, <i>J</i> 8.4, 6-H), 7.00 (1H, dq, <i>J</i> 15.0 and 6.6, CH=CH(CH <sub>3</sub> )), 7.38 (1H, d, <i>J</i> 8.4, 5-H), 7.47-7.51 (2H, m, 2'-, 6'-H or 3'-, 5'-H), 8.05-8.10 (2H, m, 2'-, 6'-H or 3'-, 5'-H), 8.32(1H, br s, NH)                                                                                          | 447(M <sup>+</sup> , 24.32),<br>368(100.00)                               | –                                                                                                                      |
| <b>17e</b> <sup>a)</sup> | 76.6      | 214.7-215.8 | $\delta_{\text{H}}$ (400 MHz; DMSO- <i>d</i> <sub>6</sub> ; Me <sub>4</sub> Si) 1.28 (3H, t, <i>J</i> 6.9, CH <sub>2</sub> CH <sub>3</sub> ), 1.88 (3H, d, <i>J</i> 6.6, CH=CH(CH <sub>3</sub> )), 3.97 (3H, s, OCH <sub>3</sub> ), 4.31 (2H, q, <i>J</i> 7.0, CH <sub>2</sub> CH <sub>3</sub> ), 6.21 (1H, d, <i>J</i> 15.4, CH=CH(CH <sub>3</sub> )), 6.80 (1H, dq, <i>J</i> 15.4 and 7.0, CH=CH(CH <sub>3</sub> )), 7.09 (1H, d, <i>J</i> 8.4, 6-H), 7.46 (1H, d, <i>J</i> 8.4, 5-H), 9.76 (1H, br s, NH)                                                           | 381(M <sup>+</sup> , 4.97),<br>69(100.00)                                 | –                                                                                                                      |
| <b>17f</b>               | 82.0      | 181.8-182.5 | $\delta_{\text{H}}$ (400 MHz; CDCl <sub>3</sub> ; Me <sub>4</sub> Si) 1.39 (3H, t, <i>J</i> 7.0, CH <sub>2</sub> CH <sub>3</sub> ), 3.89 (3H, s, OCH <sub>3</sub> ), 3.91 (6H, s, OCH <sub>3</sub> ×2), 4.01 (3H, s, OCH <sub>3</sub> ), 4.43 (2H, q, <i>J</i> 6.9, CH <sub>2</sub> CH <sub>3</sub> ), 6.58 (1H, d, <i>J</i> 15.4, CH=CH), 6.79-6.80 (2H, m, 2'-, 6'-H), 6.81 (1H, d, <i>J</i> 8.5, 6-H), 7.37 (1H, d, <i>J</i> 8.4, 5-H), 7.37 (1H, d, <i>J</i> 15.4, CH=CH), 7.79 (1H, br s, NH)                                                                     | 533(M <sup>+</sup> , 11.51),<br>221(100.00)                               | C <sub>24</sub> H <sub>24</sub> BrN <sub>1</sub> O <sub>8</sub><br>C;53.94 (53.81)<br>H;4.53 (4.49)<br>N;2.62 (2.68)   |
| <b>17g</b>               | 80.9      | 220.4-220.7 | $\delta_{\text{H}}$ (400 MHz; CDCl <sub>3</sub> ; Me <sub>4</sub> Si) 1.39 (3H, t, <i>J</i> 7.0, CH <sub>2</sub> CH <sub>3</sub> ), 3.90 (3H, s, 2'-OCH <sub>3</sub> ), 4.00 (3H, s, 7-OCH <sub>3</sub> ), 4.42 (2H, q, <i>J</i> 7.3, CH <sub>2</sub> CH <sub>3</sub> ), 6.80 (1H, d, <i>J</i> 8.5, 6-H), 6.80 (1H, d, <i>J</i> 15.8, CH=CH), 6.92 (1H, d, <i>J</i> 8.1, 3'-H), 6.97 (1H, dd, <i>J</i> 7.3, 5'-H), 7.33-7.37 (1H, m, 4'-H), 6.35 (1H, d, <i>J</i> 8.4, 5-H), 7.53 (1H, d, <i>J</i> 7.7, 6'-H), 7.78 (1H, br s, NH), 8.05 (1H, d, <i>J</i> 16.1, CH=CH) | 473(M <sup>+</sup> , 4.81),<br>161(100.00)                                | C <sub>22</sub> H <sub>20</sub> BrN <sub>2</sub> O <sub>6</sub><br>C;55.71 (55.31)<br>H;4.25 (4.19)<br>N;2.95 (2.87)   |
| <b>17h</b>               | 85.6      | 279.9-282.5 | $\delta_{\text{H}}$ (400 MHz; DOSO- <i>d</i> <sub>6</sub> ) 1.30 (3H, t, <i>J</i> 7.3, CH <sub>2</sub> CH <sub>3</sub> ), 4.00 (3H, s, OCH <sub>3</sub> ), 4.33 (2H, q, <i>J</i> 7.0, CH <sub>2</sub> CH <sub>3</sub> ), 7.03 (1H, d, <i>J</i> 16.1, CH=CH), 7.12 (1H, d, <i>J</i> 8.8, 6-H), 7.42 (1H, dd, <i>J</i> 8.1, 4'-H), 7.49 (1H, d, <i>J</i> 8.4, 5-H), 7.58-7.60 (2H, m, 3'-, 5'-H), 7.63 (1H, d, <i>J</i> 16.1, CH=CH), 10.28 (1H, br s, NH)                                                                                                               | 511(M <sup>+</sup> , 10.11),<br>432(71.65),<br>313(79.65),<br>199(100.00) | C <sub>21</sub> H <sub>16</sub> BrCl <sub>2</sub> NO <sub>5</sub><br>C;49.15 (48.93)<br>H;3.14 (3.13)<br>N;2.73 (2.88) |
| <b>17i</b>               | 86.3      | 197.9-199.4 | $\delta_{\text{H}}$ (400 MHz; CDCl <sub>3</sub> ; Me <sub>4</sub> Si) 1.40 (3H, t, <i>J</i> 7.0, CH <sub>2</sub> CH <sub>3</sub> ), 4.01 (3H, s, OCH <sub>3</sub> ), 4.44 (2H, q, <i>J</i> 7.3, CH <sub>2</sub> CH <sub>3</sub> ), 6.76 (1H, d, <i>J</i> 15.8, CH=CH), 6.82 (1H, d, <i>J</i> 8.4, 6-H), 7.36-7.38 (1H, m, pyridine H), 7.38 (1H, d, <i>J</i> 8.4, 5-H), 7.79 (1H, d, <i>J</i> 15.8, CH=CH), 7.86-7.90 (2H, m, pyridine H), 8.61 (1H, dd, <i>J</i> 4.7 and 1.5, 2'-H), 8.81 (1H, br s, NH)                                                              | 444(M <sup>+</sup> , 14.35),<br>365(64.84),<br>132(100.00)                | C <sub>20</sub> H <sub>17</sub> BrN <sub>2</sub> O <sub>5</sub><br>C;53.95 (53.92)<br>H;3.85 (3.82)<br>N;6.29 (6.26)   |

a) containing a small amount of 3-(3-chlorobutrylamino)benzo[*b*]furans.

Table S4 Physical data and yields of 20, 21

| Compd | Yield (%) | m.p. (°C)   | <sup>1</sup> H-NMR                                                                                                                                                                                                                                                                                                                                                                                                                                                                                                                                             | MS <i>m/z</i> (int.)         | formula                                                                                                                               |
|-------|-----------|-------------|----------------------------------------------------------------------------------------------------------------------------------------------------------------------------------------------------------------------------------------------------------------------------------------------------------------------------------------------------------------------------------------------------------------------------------------------------------------------------------------------------------------------------------------------------------------|------------------------------|---------------------------------------------------------------------------------------------------------------------------------------|
|       |           |             |                                                                                                                                                                                                                                                                                                                                                                                                                                                                                                                                                                |                              | HR-MS <i>m/z</i> M <sup>+</sup><br>Calcd (Found)<br>or Analysis<br>Calcd(Found)                                                       |
| 20a   | 34.4      | 246.5-248.3 | δ <sub>H</sub> (500 MHz; CDCl <sub>3</sub> ; Me <sub>4</sub> Si) 2.58 (3H, s, COCH <sub>3</sub> ), 4.01 (3H, s, OCH <sub>3</sub> ), 5.99 (1H, d, <i>J</i> 2.3, 5-H), 6.76 (1H, d, <i>J</i> 8.2, 7- or 8-H), 6.78 (1H, d, <i>J</i> 8.7, 7- or 8-H), 7.32-7.34 (2H, m, phenyl H), 7.42-7.45 (3H, m, phenyl H), 9.71 (1H, br s, NH)                                                                                                                                                                                                                               | 333(M <sup>+</sup> , 100.00) | C <sub>20</sub> H <sub>15</sub> NO <sub>4</sub><br>C;72.06 (71.78)<br>H;4.54 (4.44)<br>N;4.20 (4.15)                                  |
| 20b   | 62.2      | 241.7-224.0 | δ <sub>H</sub> (400 MHz; CDCl <sub>3</sub> ; Me <sub>4</sub> Si) 1.44 (3H, t, <i>J</i> 7.3, CH <sub>2</sub> CH <sub>3</sub> ), 3.99 (3H, s, OCH <sub>3</sub> ), 4.47 (2H, q, <i>J</i> 7.3, CH <sub>2</sub> CH <sub>3</sub> ), 5.94 (1H, d, <i>J</i> 2.2, 5-H), 6.72 (1H, d, <i>J</i> 8.4, 7- or 8-H), 6.75 (1H, d, <i>J</i> 8.4, 7- or 8-H), 7.32-7.35 (2H, m, phenyl H), 7.42-7.46 (3H, m, phenyl H), 9.00 (1H, br s, NH)                                                                                                                                     | 363(M <sup>+</sup> , 100.00) | C <sub>21</sub> H <sub>17</sub> NO <sub>5</sub><br>C;69.41 (69.18)<br>H;4.72 (4.63)<br>N;3.85 (3.90)                                  |
| 20c   | 34.3      | 278.8-280.2 | δ <sub>H</sub> (500 MHz; CDCl <sub>3</sub> ; Me <sub>4</sub> Si) 2.27 (3H, d, <i>J</i> 0.9, 6-CH <sub>3</sub> ), 2.56 (3H, s, COCH <sub>3</sub> ), 4.05 (3H, s, OCH <sub>3</sub> ), 6.04 (1H, q, <i>J</i> 0.9, 5-H), 6.92 (1H, d, <i>J</i> 8.3, 8-H), 7.20 (1H, d, <i>J</i> 8.3, 7-H), 9.63 (1H, br s, NH)                                                                                                                                                                                                                                                     | 271(M <sup>+</sup> , 100.00) | C <sub>15</sub> H <sub>13</sub> NO <sub>4</sub><br>C;66.41 (66.19)<br>H;4.83 (4.77)<br>N;5.16 (5.16)                                  |
| 20d   | 42.7      | 262.1-262.4 | δ <sub>H</sub> (500 MHz; CDCl <sub>3</sub> ; Me <sub>4</sub> Si) 2.33 (3H, d, <i>J</i> 1.3, 6-CH <sub>3</sub> ), 4.04 (3H, s, OCH <sub>3</sub> ), 6.11 (1H, d, <i>J</i> 1.4, 5-H), 6.95 (1H, d, <i>J</i> 8.2, 8-H), 7.23 (1H, d, <i>J</i> 8.7, 7-H), 7.51-7.53 (2H, m, 2'-, 6'-H or 3'-, 5'-H), 8.22-8.24 (2H, m, 2'-, 6'-H or 3'-, 5'-H), 10.22 (1H, br s, NH)                                                                                                                                                                                                | 367(M <sup>+</sup> , 100.00) | C <sub>20</sub> H <sub>14</sub> ClNO <sub>4</sub><br>C;65.31 (65.19)<br>H;3.84 (3.71)<br>N;3.81 (3.84)                                |
| 20e   | 60.9      | 221.4-223.8 | δ <sub>H</sub> (400 MHz; CDCl <sub>3</sub> ; Me <sub>4</sub> Si) 1.43 (3H, t, <i>J</i> 7.0, CH <sub>2</sub> CH <sub>3</sub> ), 2.27 (3H, d, <i>J</i> 1.1, 6-CH <sub>3</sub> ), 4.02 (3H, s, OCH <sub>3</sub> ), 4.45 (2H, q, <i>J</i> 6.9, CH <sub>2</sub> CH <sub>3</sub> ), 6.02 (1H, q, <i>J</i> 1.1, 5-H), 6.88 (1H, d, <i>J</i> 8.4, 8-H), 7.19 (1H, d, <i>J</i> 8.4, 7-H), 8.96 (1H, br s, NH)                                                                                                                                                           | 301(M <sup>+</sup> , 100.00) | C <sub>16</sub> H <sub>15</sub> NO <sub>5</sub><br>C;63.78 (63.46)<br>H;5.02 (5.03)<br>N;4.65 (4.66)                                  |
| 20f   | 44.9      | 250.0-252.4 | δ <sub>H</sub> (400 MHz; CDCl <sub>3</sub> ; Me <sub>4</sub> Si) 1.45 (3H, t, <i>J</i> 7.3, CH <sub>2</sub> CH <sub>3</sub> ), 3.86 (6H, s, OCH <sub>3</sub> ×2), 3.91 (3H, s, OCH <sub>3</sub> ), 4.00 (3H, s, OCH <sub>3</sub> ), 4.67 (2H, q, <i>J</i> 7.4, CH <sub>2</sub> CH <sub>3</sub> ), 5.98 (1H, d, <i>J</i> 2.6, 5-H), 6.56 (2H, s, 2'-, 6'-H), 6.76 (1H, d, <i>J</i> 8.4, 8-H), 6.86 (1H, d, <i>J</i> 8.4, 7-H), 9.00 (1H, br s, NH)                                                                                                              | 453(M <sup>+</sup> , 100.00) | C <sub>24</sub> H <sub>23</sub> NO <sub>8</sub><br>C;63.57 (63.19)<br>H;5.11 (5.28)<br>N;3.09 (3.02)                                  |
| 20g   | 51.8      | 192.1-192.9 | δ <sub>H</sub> (500 MHz; CDCl <sub>3</sub> ; Me <sub>4</sub> Si) 1.44 (3H, t, <i>J</i> 7.3, CH <sub>2</sub> CH <sub>3</sub> ), 3.73 (3H, s, 2'-OCH <sub>3</sub> ), 3.97 (3H, s, 9-OCH <sub>3</sub> ), 4.47 (2H, q, <i>J</i> 7.3, CH <sub>2</sub> CH <sub>3</sub> ), 5.93 (1H, d, <i>J</i> 2.3, 5-H), 6.55 (1H, d, <i>J</i> 8.2, 7-H), 6.70 (1H, d, <i>J</i> 8.2, 8-H), 6.98 (1H, d, <i>J</i> 8.3, 3'-H), 7.03 (1H, ddd, <i>J</i> 7.3 and 1.0, 5'-H), 7.18 (1H, d, <i>J</i> 7.3 and 1.8, 6'-H), 7.40 (1H, ddd, <i>J</i> 6.4 and 1.9, 4'-H), 9.01 (1H, br s, NH) | 393(M <sup>+</sup> , 100.00) | C <sub>22</sub> H <sub>19</sub> NO <sub>6</sub><br>C;67.17 (66.95)<br>H;4.87 (4.84)<br>N;3.56 (3.55)                                  |
| 20h   | 41.0      | 257.5-258.7 | δ <sub>H</sub> (400 MHz; CDCl <sub>3</sub> ; Me <sub>4</sub> Si) 1.44 (3H, t, <i>J</i> 7.0, CH <sub>2</sub> CH <sub>3</sub> ), 3.98 (3H, s, OCH <sub>3</sub> ), 4.48 (2H, q, <i>J</i> 7.0, CH <sub>2</sub> CH <sub>3</sub> ), 5.88 (1H, d, <i>J</i> 2.2, 5-H), 6.40 (1H, d, <i>J</i> 8.5, 7-H or 8-H), 6.72 (1H, d, <i>J</i> 8.4, 7-H or 8-H), 7.32 (1H, dd, <i>J</i> 8.8, 4'-H), 7.43-7.45 (2H, m, 3'-, 5'-H), 9.06 (1H, br s, NH)                                                                                                                            | 431(M <sup>+</sup> , 100.00) | C <sub>21</sub> H <sub>15</sub> NO <sub>5</sub> Cl <sub>2</sub><br>C;58.35 (58.62)<br>H;3.50 (3.51)<br>N;3.24 (3.33)                  |
| 20i   | 12.5      | 246.2-249.3 | δ <sub>H</sub> (500 MHz; CDCl <sub>3</sub> ; Me <sub>4</sub> Si) 1.45 (3H, t, <i>J</i> 7.4, CH <sub>2</sub> CH <sub>3</sub> ), 4.00 (3H, s, OCH <sub>3</sub> ), 4.48 (2H, q, <i>J</i> 7.4, CH <sub>2</sub> CH <sub>3</sub> ), 5.92 (1H, d, <i>J</i> 2.3, 5-H), 6.65 (1H, d, <i>J</i> 8.3, 7-H or 8-H), 6.74 (1H, d, <i>J</i> 8.7, 7-H or 8-H), 7.39-7.42 (1H, m, pyridine H), 7.67-7.69 (1H, m, pyridine H), 8.63 (1H, s, pyridine H), 8.70 (1H, d, <i>J</i> 3.6, pyridine H), 9.30 (1H, br s, NH)                                                             | 364(M <sup>+</sup> , 100.00) | C <sub>20</sub> H <sub>16</sub> N <sub>2</sub> O <sub>5</sub> ·¼H <sub>2</sub> O<br>C;65.12 (65.20)<br>H;4.51 (4.44)<br>N;7.59 (7.49) |
| 20j   | 30.2      | 247.1-249.7 | δ <sub>H</sub> (400 MHz; CDCl <sub>3</sub> ; Me <sub>4</sub> Si) 2.55 (3H, s, COCH <sub>3</sub> ), 4.04 (3H, s, OCH <sub>3</sub> ), 5.92 (1H, dd, <i>J</i> 12.5 and 2.2, 5-H), 6.79 (1H, d, <i>J</i> 12.8, 6-H), 6.89 (1H, d, <i>J</i> 8.0, 8-H), 7.02 (1H, d, <i>J</i> 8.1, 7-H), 9.55 (1H, br s, NH)                                                                                                                                                                                                                                                         | 257(M <sup>+</sup> , 100.00) | C <sub>14</sub> H <sub>11</sub> NO <sub>4</sub><br>C;65.37 (65.36)<br>H;4.31 (4.22)<br>N;5.44 (5.42)                                  |

|            |      |                 |                                                                                                                                                                                                                                                                                                                           |                                     |                                                                                               |
|------------|------|-----------------|---------------------------------------------------------------------------------------------------------------------------------------------------------------------------------------------------------------------------------------------------------------------------------------------------------------------------|-------------------------------------|-----------------------------------------------------------------------------------------------|
| <b>20k</b> | 24.1 | 259.5-<br>260.4 | $\delta_H$ (500 MHz; $CDCl_3$ ; $Me_4Si$ ) 4.04 (3H, s, $OCH_3$ ), 5.97 (1H, dd, $J$ 12.4 and 2.3, 5-H), 6.84 (1H, d, $J$ 12.4, 6-H), 6.92 (1H, d, $J$ 8.3, 8-H), 7.06 (1H, d, $J$ 7.8, 7-H), 7.51-7.53 (2H, m, 2'-, 6'-H or 3'-, 5'-H), 8.22-8.23 (2H, m, 2'-, 6'-H or 3'-, 5'-H), 10.12 (1H, br s, $NH$ )               | 353( $M^+$ , 100.00)<br>139(35.37)  | $C_{19}H_{12}ClNO_4$<br>353.0455<br>(353.0454)                                                |
| <b>20l</b> | 28.0 | 205.5-<br>208.5 | $\delta_H$ (400 MHz; $CDCl_3$ ; $Me_4Si$ ) 1.46 (3H, t, $J$ 7.0, $CH_2CH_3$ ), 4.02 (3H, s, $OCH_3$ ), 4.45 (2H, q, $J$ 6.9, $CH_2CH_3$ ), 5.88 (1H, dd, $J$ 12.4 and 2.2, 5-H), 6.78 (1H, d, $J$ 12.5, 6-H), 6.83 (1H, d, $J$ 8.0, 8-H), 7.01 (1H, d, $J$ 8.1, 7-H), 8.87 (1H, br s, $NH$ )                              | 287( $M^+$ , 100.00)                | $C_{15}H_{13}NO_5 \cdot \frac{1}{2}H_2O$<br>C;60.81 (60.64)<br>H;4.76 (4.63)<br>N;4.73 (5.07) |
| <b>21a</b> | 2.2  | 203.2-<br>204.5 | $\delta_H$ (500 MHz; $CDCl_3$ ; $Me_4Si$ ) 1.38 (3H, d, $J$ 6.9, $CH(CH_3)$ ), 2.60 (3H, s, $COCH_3$ ), 2.97-3.02 (2H, m, $CH_2$ ), 3.32-3.38 (1H, m, $CH(CH_3)$ ), 4.02 (3H, s, $OCH_3$ ), 6.93 (1H, d, $J$ 7.8, 8-H), 7.00 (1H, d, $J$ 8.3, 7-H), 9.55 (1H, br s, $NH$ )                                                | 273( $M^+$ , 85.79),<br>258(100.00) | $C_{15}H_{15}NO_4$<br>C;65.92 (65.71)<br>H;5.53 (5.49)<br>N;5.13 (5.10)                       |
| <b>21b</b> | 3.3  | 210.3-<br>212.4 | $\delta_H$ (400 MHz; $CDCl_3$ ; $Me_4Si$ ) 1.39 (3H, d, $J$ 7.0, $CH(CH_3)$ ), 1.43 (3H, t, $J$ 7.3, $CH_2CH_3$ ), 2.93-3.04 (2H, m, $CH_2$ ), 3.32-3.38 (1H, m, $CH(CH_3)$ ), 4.00 (3H, s, $OCH_3$ ), 4.47 (2H, q, $J$ 7.0, $CH_2CH_3$ ), 6.89 (1H, d, $J$ 8.0, 8-H), 7.00 (1H, d, $J$ 8.1, 7-H), 8.94 (1H, br s, $NH$ ) | 303( $M^+$ , 100.00)                | $C_{16}H_{17}NO_6$<br>303.1107<br>(303.1104)                                                  |

---

**Table S5** Physical data and yields of **23**, **25**

| Compd      | Yield (%) | m.p. (°C)       | <sup>1</sup> H-NMR                                                                                                                                                                                                                                                                                                                                                                                                                                                                                                                                                                          | MS <i>m/z</i> (int.)                        | formula                                                                                                                                                     |
|------------|-----------|-----------------|---------------------------------------------------------------------------------------------------------------------------------------------------------------------------------------------------------------------------------------------------------------------------------------------------------------------------------------------------------------------------------------------------------------------------------------------------------------------------------------------------------------------------------------------------------------------------------------------|---------------------------------------------|-------------------------------------------------------------------------------------------------------------------------------------------------------------|
|            |           |                 |                                                                                                                                                                                                                                                                                                                                                                                                                                                                                                                                                                                             |                                             | HR-MS <i>m/z</i> M <sup>+</sup><br>Calcd (Found)<br>or Analysis<br>Calcd(Found)                                                                             |
| <b>23a</b> | 62.7      | oil             | $\delta_{\text{H}}$ (60 MHz; CDCl <sub>3</sub> ; Me <sub>4</sub> Si) 2.46-2.89 (4H, m, CH <sub>2</sub> ×2), 3.52-3.79 (4H, m, CH <sub>2</sub> ×2), 3.85 (6H, s, OCH <sub>3</sub> ×2), 5.69-6.78 (4H, m, 2-, 5-, 6-H and NH)                                                                                                                                                                                                                                                                                                                                                                 | 271(M <sup>+</sup> , 6.02),<br>164(100.00)  | –                                                                                                                                                           |
| <b>23b</b> | 57.8      | 85.7-<br>86.3   | $\delta_{\text{H}}$ (60 MHz; CDCl <sub>3</sub> ; Me <sub>4</sub> Si) 2.79 (2H, t, <i>J</i> 6.5, CH <sub>2</sub> ), 3.78-3.96 (5H, m, OCH <sub>3</sub> , CH <sub>2</sub> ), 6.61-7.26 (4H, m, 2-, 4-, 5-, 6-H)                                                                                                                                                                                                                                                                                                                                                                               | 213(M <sup>+</sup> , 13.00),<br>123(100.00) | –                                                                                                                                                           |
| <b>23c</b> | 98.3      | oil             | $\delta_{\text{H}}$ (60 MHz; CDCl <sub>3</sub> ; Me <sub>4</sub> Si) 1.19 (6H, m, CH <sub>2</sub> CH <sub>3</sub> ×2), 2.78-3.74 (8H, m, CH <sub>2</sub> CH <sub>3</sub> ×2, CH <sub>2</sub> CH <sub>2</sub> )                                                                                                                                                                                                                                                                                                                                                                              | 163(M <sup>+</sup> , 28.04),<br>128(100.00) | –                                                                                                                                                           |
| <b>25a</b> | 45.6      | 178.7-<br>181.5 | $\delta_{\text{H}}$ (400 MHz; CDCl <sub>3</sub> ; Me <sub>4</sub> Si) 2.64 (3H, s, COCH <sub>3</sub> ), 2.86 (2H, t, <i>J</i> 6.9, NHCH <sub>2</sub> CH <sub>2</sub> ), 3.67 (2H, m, NHCH <sub>2</sub> CH <sub>2</sub> ), 3.87 (3H, s, OCH <sub>3</sub> ), 3.87 (3H, s, OCH <sub>3</sub> ), 4.05 (3H, s, OCH <sub>3</sub> ), 5.68 (1H, br t, <i>J</i> 5.5, NH), 6.37 (1H, d, <i>J</i> 15.7, CH=CH), 6.76-6.79 (2H, m, 2'-, 6'-H), 6.83 (1H, d, <i>J</i> 7.7, 5'-H), 6.92 (1H, d, <i>J</i> 8.1, 6-H), 7.39 (1H, d, <i>J</i> 8.4, 5-H), 7.72 (1H, s, 3-H), 7.82 (1H, d, <i>J</i> 15.8, CH=CH) | 423(M <sup>+</sup> , 8.64),<br>164(100.00)  | C <sub>24</sub> H <sub>25</sub> NO <sub>6</sub> · 1/3H <sub>5</sub> O<br>C;67.12 (67.47)<br>H;6.02 (6.02)<br>N;3.26 (3.31)                                  |
| <b>25b</b> | 56.2      | 214.0-<br>214.9 | $\delta_{\text{H}}$ (400 MHz; CDCl <sub>3</sub> ; Me <sub>4</sub> Si) 2.67 (3H, s, COCH <sub>3</sub> ), 3.84 (3H, s, OCH <sub>3</sub> ), 4.07 (3H, s, OCH <sub>3</sub> ), 6.58 (1H, d, <i>J</i> 15.3, CH=CH), 6.71 (1H, dd, <i>J</i> 8.1 and 2.2, 4'- or 6'-H), 6.95 (1H, d, <i>J</i> 8.1, 6-H), 7.08 (1H, d, <i>J</i> 7.3, 4'- or 6'-H), 7.22-7.30 (1H, m, 5'- or 2'-H), 7.40 (1H, br s, NH), 7.45 (1H, d, <i>J</i> 8.4, 5-H), 7.44-7.50 (1H, m, 5'- or 2'-H), 7.79 (1H, s, 3-H), 7.95 (1H, d, <i>J</i> 15.4, CH=CH)                                                                       | 365(M <sup>+</sup> , 22.47),<br>243(100.00) | C <sub>21</sub> H <sub>19</sub> NO <sub>5</sub> ·<br>¼CH <sub>3</sub> COOC <sub>2</sub> H <sub>5</sub><br>C;68.21 (68.54)<br>H;5.46 (5.30)<br>N;3.62 (3.78) |
| <b>25c</b> | 5.1       | oil             | $\delta_{\text{H}}$ (400 MHz; CDCl <sub>3</sub> ; Me <sub>4</sub> Si) 1.16-1.33 (6H, m, CH <sub>2</sub> CH <sub>3</sub> ×2), 2.64 (3H, s, COCH <sub>3</sub> ), 3.47-3.52 (4H, m, CH <sub>2</sub> CH <sub>3</sub> ×2), 4.06 (3H, s, OCH <sub>3</sub> ), 6.87 (1H, d, <i>J</i> 15.4, CH=CH), 6.95 (1H, d, <i>J</i> 8.5, 6-H), 7.45 (1H, d, <i>J</i> 8.4, 5-H), 7.73 (1H, s, 3-H), 7.92 (1H, d, <i>J</i> 15.4, CH=CH)                                                                                                                                                                          | 315(M <sup>+</sup> , 67.57),<br>243(100.01) | C <sub>18</sub> H <sub>21</sub> NO <sub>4</sub><br>315.1471<br>(315.1469)                                                                                   |
